# Supplementary material
Source: publisher site journal article supplement (http://kjim.org/upload/media/kjim-2020-629-suppl4.pdf)
Supplement: Supplementary file 1 [file kjim-2020-629-suppl4.pdf]

**Supplementary Table 4. Relative changes in central fatness from baseline and risk of diabetes<sup>a</sup>**

| Variable                                   | No. of cases/total | OR (95% CI)      |                      |                      |
|--------------------------------------------|--------------------|------------------|----------------------|----------------------|
|                                            |                    | Unadjusted       | Model 1 <sup>b</sup> | Model 2 <sup>c</sup> |
| Per 1 SD higher of relative change in WC   | 177/1,815          | 1.27 (1.08–1.48) | 1.31 (1.11–1.53)     | 1.38 (1.16–1.64)     |
| Per 1 SD higher of relative change in WHtR | 177/1,815          | 1.25 (1.07–1.45) | 1.29 (1.10–1.52)     | 1.38 (1.16–1.64)     |
| Per 1 SD higher of relative change in BRI  | 177/1,815          | 1.19 (1.03–1.38) | 1.24 (1.06–1.44)     | 1.32 (1.12–1.55)     |

OR, odds ratio; CI, confidence interval; SD, standard deviation; WC, waist circumference; WHtR, waist-height ratio; BRI, body roundness index.

<sup>a</sup>Relative changes were calculated as the change scores divided by the baseline score.

<sup>b</sup>Adjusted for age, sex, and body mass index.

<sup>c</sup>Adjusted for age, sex, body mass index, history of smoking and drinking, disease status (hypertension, dyslipidemia and cardiovascular disease), systolic blood pressure, hemoglobin A1c, total cholesterol/high-density lipoprotein cholesterol, uric acid, C-reactive protein, and walking speed at baseline.
